# Supplementary material for: Molecular and proteomic analyses highlight the importance of ubiquitination for the stress resistance, metabolic adaptation, morphogenetic regulation and virulence of Candida albicans
Source: PubMed Central journal article supplement (PMC3084552; doi:10.1111/j.1365-2958.2011.07542.x), 2011-03
Supplement: mmi0079-1574-SD1.pdf [file mmi0079-1574-SD1.pdf]

## Summary of Supplementary Data

| Sheet | Title                  | Description                                                                                                 |
|-------|------------------------|-------------------------------------------------------------------------------------------------------------|
| 1     | Summary                | Summary of Supplementary Data                                                                               |
| 2     | Ubiquitination Targets | List of ubiquitination targets in <i>C. albicans</i>                                                        |
| 3     | MET3p-UBI4 control     | Effects of stress upon <i>C. albicans</i> MET3p-UBI4/ <i>ubi4</i> in the absence of methionine and cysteine |
| 4     | Ponceau S Stain        | Ponceau S stain of UBI4/UBI4, UBI4/ <i>ubi4</i> and <i>ubi4/ubi4</i> to control loading                     |
| 5     | Primers                | List of PCR primers used in this study                                                                      |

## Identification of probable ubiquitination targets in *C. albicans*

| Sample Ref                                                                | Accession Number (CandidaDB) | Accession Number (CGD) | Protein Name | Mol. Wt. (Da) | pI   | Mascot Score | Peptides Matched | Sequence Coverage | ELDP | Function                                           | Ubiquitinated in <i>S. cerevisiae</i> ? | Predicted Ubiquitination Site(s)                                                                          | Ubiquitination detected in absence of stress? | Ubiquitination upregulated in response to stress? |
|---------------------------------------------------------------------------|------------------------------|------------------------|--------------|---------------|------|--------------|------------------|-------------------|------|----------------------------------------------------|-----------------------------------------|-----------------------------------------------------------------------------------------------------------|-----------------------------------------------|---------------------------------------------------|
| <b>Constitutively ubiquitinated</b>                                       |                              |                        |              |               |      |              |                  |                   |      |                                                    |                                         |                                                                                                           |                                               |                                                   |
| 1                                                                         | Ca2937                       | orf19.3325.3           | RPS21 B      | 8807          | 8.85 | 372          | 4                | 48%               | 2    | Similar to ribosomal protein S21                   | No                                      | Medium confidence, position 5                                                                             | Yes                                           | Downregulated                                     |
| 2                                                                         | Ca1691                       | orf19.3651             | PGK1         | 45266         | 6.07 | 2080         | 37               | 84%               | 12   | Phosphoglycerate kinase                            | Yes                                     | Medium confidence, position 6; low confidence, position 296                                               | Yes                                           | No                                                |
| 3                                                                         | Ca5180                       | orf19.4618             | FBA1         | 39362         | 5.69 | 2000         | 24               | 79%               | 9    | Putative fructose-bisphosphate aldolase            | Yes                                     | Medium confidence, position 72 and 192; low confidence, position 77                                       | Yes                                           | No                                                |
| 4                                                                         | Ca2939                       | orf19.3324             | TIF1         | 44742         | 5.22 | 1397         | 26               | 72%               | 15   | Translation initiation factor                      | Yes                                     | Low confidence, position 24                                                                               | Yes                                           | No                                                |
|                                                                           | Ca0824                       | orf19.691              | GPD2         | 41174         | 5.21 | 313          | 9                | 33%               | 7    | Glycerol-3-phosphate dehydrogenase                 | Yes                                     | Low confidence, position 274 and 318                                                                      | Yes                                           | No                                                |
| <b>Increased ubiquitination in response to heat</b>                       |                              |                        |              |               |      |              |                  |                   |      |                                                    |                                         |                                                                                                           |                                               |                                                   |
| 5                                                                         | Ca3874                       | orf19.395              | ENO1         | 47202         | 5.54 | 204          | 7                | 23%               | 7    | Enolase                                            | Yes                                     | High confidence, position 273; medium confidence, position 265; low confidence, position 432              | Yes                                           | Heat                                              |
| 6                                                                         | Ca4389                       | orf19.3123             | RPT5         | 47814         | 5.25 | 1059         | 21               | 60%               | 13   | Regulatory particle triphosphatase                 | Yes                                     | Medium confidence, position 55, 63, 163, 170, 284 and 290; low confidence, position 35 and 92             | Yes                                           | Heat                                              |
| 7                                                                         | Ca3924                       | orf19.5112             | TKL1         | 73841         | 5.48 | 1036         | 23               | 45%               | 10   | Putative transketolase                             | Yes                                     | Low confidence, position 351                                                                              | No                                            | Heat                                              |
| 8                                                                         | Ca2895                       | orf19.2461             | PRN4         | 37072         | 5.31 | 496          | 16               | 47%               | 3    | Putative pirin by homology                         | No                                      | High confidence, position 315; medium confidence, position 234; low confidence, position 240, 320 and 327 | No                                            | Heat                                              |
| 9                                                                         | Ca5239                       | orf19.5024             | GND1         | 57159         | 6.14 | 478          | 19               | 38%               | 13   | Putative 6-phosphogluconate dehydrogenase          | Yes                                     | Medium confidence, position 151 and 388                                                                   | No                                            | Heat                                              |
|                                                                           | Ca2011                       | orf19.3087             | UBI3         | 17485         | 9.86 | 42           | 1                | 14%               | 0    | Functional homologue of <i>S. cerevisiae</i> RPS31 | No                                      | Medium confidence, position 105                                                                           | No                                            | Heat                                              |
| 10                                                                        | Ca0210                       | orf19.5525             | IPF4328      | 37783         | 5.53 | 417          | 11               | 42%               | 9    | Putative NADP(H) oxidoreductase                    | No                                      | Medium confidence, position 285; low confidence, position 268 and 344                                     | No                                            | Heat                                              |
| <b>Increased ubiquitination in response to H<sub>2</sub>O<sub>2</sub></b> |                              |                        |              |               |      |              |                  |                   |      |                                                    |                                         |                                                                                                           |                                               |                                                   |
| 11                                                                        | Ca4261                       | orf19.550              | PDX3         | 28773         | 6.02 | 356          | 13               | 68%               | 1    | Pyridoxine (pyridoxamine) phosphate oxidase        | Yes                                     | Medium confidence, position 22 and 58                                                                     | No                                            | H <sub>2</sub> O <sub>2</sub>                     |
| 12                                                                        | Ca2675                       | orf19.5493             | GSP1         | 24470         | 6.53 | 146          | 5                | 35%               | 5    | Small RAN G-protein                                | Yes                                     | Medium confidence, position 193                                                                           | No                                            | H <sub>2</sub> O <sub>2</sub>                     |
|                                                                           | Ca5932                       | orf19.6771             | UBI4         | 25776         | 7.76 | 53           | 1                | 10%               | 1    | Ubiquitin precursor (polyubiquitin)                | Yes                                     | Low confidence, position 33, 48, 63, 139, 179 and 215                                                     | No                                            | H <sub>2</sub> O <sub>2</sub>                     |
| 13                                                                        | Ca1673                       | orf19.3612             | PST2         | 21714         | 6.51 | 206          | 7                | 52%               | 7    | Putative NADH:quinone oxidoreductase               | Yes                                     | None                                                                                                      | No                                            | H <sub>2</sub> O <sub>2</sub>                     |

|    |        |            |      |       |      |     |    |     |   |                                                               |     |                             |    |                               |
|----|--------|------------|------|-------|------|-----|----|-----|---|---------------------------------------------------------------|-----|-----------------------------|----|-------------------------------|
|    | Ca5037 | orf19.6991 | PRE3 | 23629 | 6.42 | 155 | 7  | 32% | 3 | Beta-1 subunit of proteasome                                  | No  | Low confidence, position 12 | No | H <sub>2</sub> O <sub>2</sub> |
| 14 | Ca4791 | orf19.4025 | PRE1 | 22119 | 6.43 | 273 | 11 | 38% | 4 | Beta 4 subunit of the 20S proteasome ( <i>S. cerevisiae</i> ) | No  | Low confidence, position 19 | No | H <sub>2</sub> O <sub>2</sub> |
|    | Ca4589 | orf19.6906 | ASC1 | 23619 | 6.3  | 85  | 5  | 27% | 3 | 40S ribosomal subunit protein                                 | Yes | None                        | No | H <sub>2</sub> O <sub>2</sub> |
|    | Ca5932 | orf19.6771 | UBI4 | 25776 | 7.76 | 76  | 3  | 24% | 1 | Ubiquitin precursor (polyubiquitin)                           | Yes |                             | No | H <sub>2</sub> O <sub>2</sub> |

***Increased ubiquitination in response to heat and H<sub>2</sub>O<sub>2</sub>***

|    |        |            |       |       |      |      |    |     |    |                                                 |     |                                                                                                                                     |    |                                        |
|----|--------|------------|-------|-------|------|------|----|-----|----|-------------------------------------------------|-----|-------------------------------------------------------------------------------------------------------------------------------------|----|----------------------------------------|
| 15 | CA3534 | orf19.6367 | SSB1  | 66580 | 5.25 | 2786 | 35 | 67% | 22 | Putative HSP70 family heat shock protein        | Yes | High confidence, position 528 and 545; medium confidence, position 521, 530, 543 and 597; low confidence, position 191, 314 and 393 | No | Heat and H <sub>2</sub> O <sub>2</sub> |
| 16 | Ca1246 | orf19.18   | IMH3  | 40055 | 6.67 | 1879 | 25 | 74% | 8  | Inosine monophosphate (IMP) dehydrogenase       | No  | Medium confidence, position 7; low confidence, position 24, 175, 230 and 517                                                        | No | Heat and H <sub>2</sub> O <sub>2</sub> |
| 17 | Ca3546 | orf19.6385 | ACO1  | 84625 | 5.96 | 1669 | 38 | 52% | 22 | Aconitase                                       | No  | Medium confidence, position 25.                                                                                                     | No | Heat and H <sub>2</sub> O <sub>2</sub> |
| 18 | Ca2858 | orf19.1064 | ACS2  | 74215 | 5.73 | 1300 | 32 | 54% | 20 | Probable acetyl-CoA synthetase                  | Yes | Medium confidence, position 32 and 596; low confidence, position 17 and 583                                                         | No | Heat and H <sub>2</sub> O <sub>2</sub> |
| 19 | Ca2470 | orf19.2871 | SDH12 | 70930 | 6.03 | 790  | 21 | 47% | 11 | Flavoprotein subunit of succinate dehydrogenase | No  | Medium confidence, position 480; low confidence, position 417, 492 and 500                                                          | No | Heat and H <sub>2</sub> O <sub>2</sub> |

Effects of stress upon *C. albicans* *MET3p-UBI4/ubi4* in the absence of methionine and cysteine

NO Met/Cys control

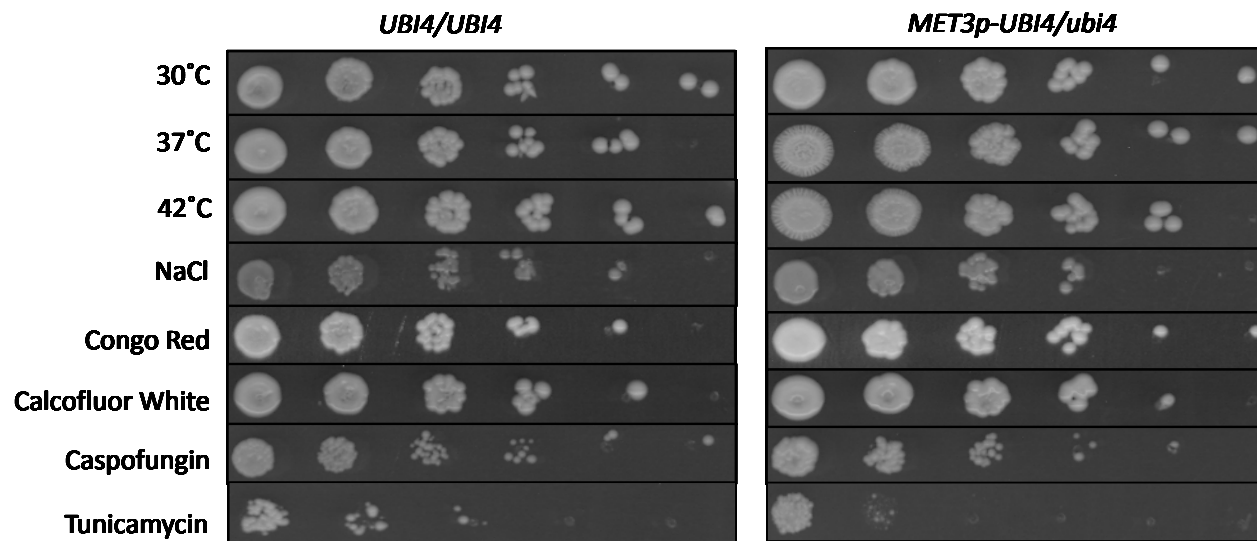

PLUS Met/Cys (Figure 4B)

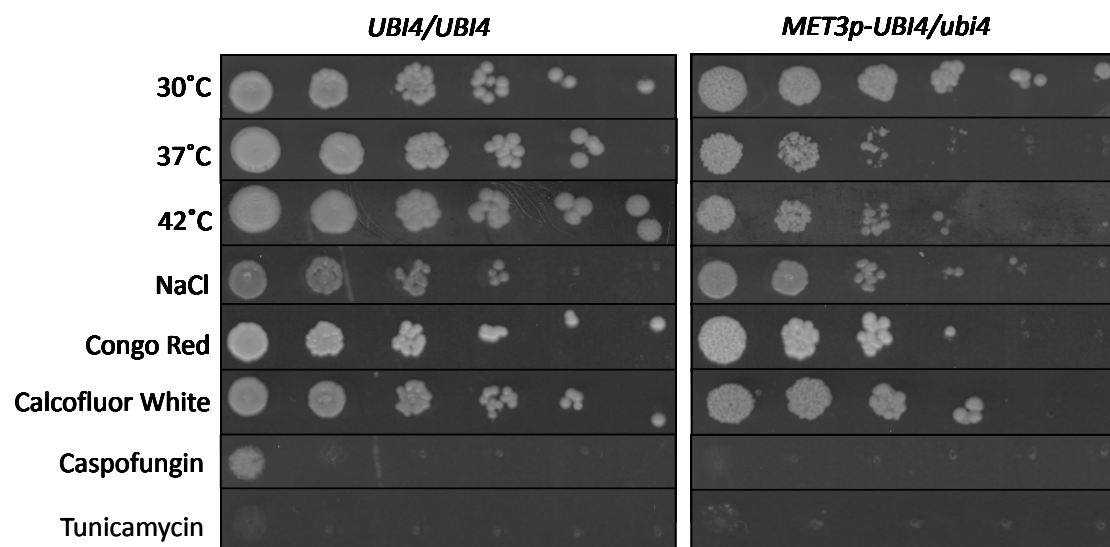

Sensitivity of a *MET3p-UBI4/ubi4* conditional mutant to stresses. Serial dilutions were spotted onto SC plates containing the appropriate stress and containing 2.5 mM methionine and cysteine: *UBI4/UBI4* (BWP17); *MET3p-UBI4/ubi4* (MLC05). These strains grew at similar rates on control plates that lacked methionine and cysteine (Above).

Ponceau S staining to demonstrate even loading

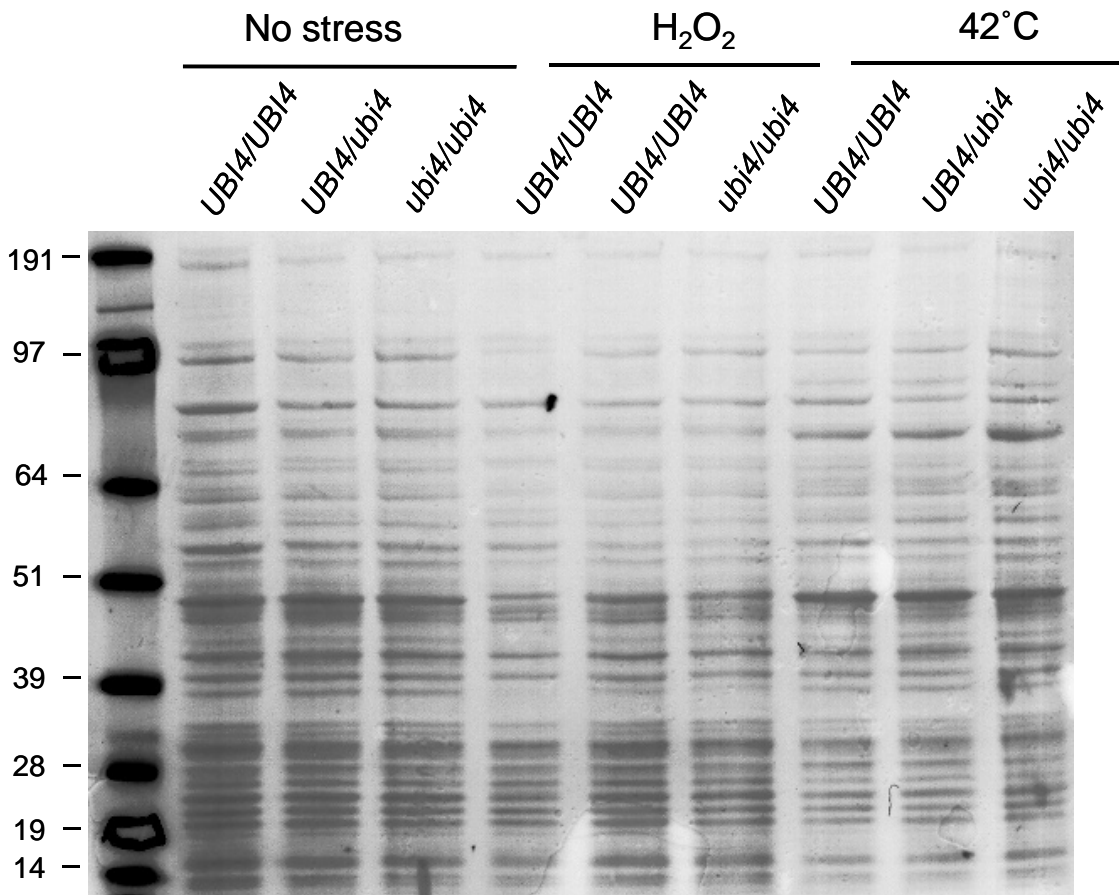

---

## Oligonucleotides used in this study

| Primer   | Sequence (5' to 3')                                                                                                              | Application                                                                            |
|----------|----------------------------------------------------------------------------------------------------------------------------------|----------------------------------------------------------------------------------------|
| UBI4d-F  | CCTAGTTGCCTTAACGACAG                                                                                                             | Diagnosis of <i>UBI4</i> allele                                                        |
| UBI4d2-F | GCGACATTAATAATAGGAGAGGC                                                                                                          | Diagnosis of <i>UBI4</i> , <i>ARG4</i> and <i>URA3</i> alleles                         |
| UBI4d-R  | GTCAGACAAGGTTCTGCC                                                                                                               | Diagnosis of <i>UBI4</i> and <i>URA3-MET3-UBI4</i> alleles                             |
| UBI4d2-R | CTTGAGAAGACATAAGTAAGG                                                                                                            | Diagnosis of <i>UBI4</i> , <i>ARG4</i> , <i>URA3</i> and <i>URA3-MET3-UBI4</i> alleles |
| MET3p-F  | ATTGCTGTGGATCACGTGC                                                                                                              | Diagnosis of <i>URA3-MET3-UBI4</i> allele                                              |
| LALd-R   | GCCCATCTAATAGTTGAGC                                                                                                              | Diagnosis of <i>UBI4::ARG4</i> allele                                                  |
| LULd-R   | GTATGGGGTTGTTGCTCAGG                                                                                                             | Diagnosis of <i>UBI4::URA3</i> allele                                                  |
| MetUS-F  | CCTCGTTCATTCTAATTCAATACAAGTTTGTATTGTTTATACCATGTTTAT<br>ACAAACGGGTTTAAATTATAATTACGGTAGCCGGCCGACTTGGCCAAG<br>CCTAGATC              | Amplification of <i>URA3-MET3-UBI4</i> cassette                                        |
| MetUS-R  | GGATTTGACGTTATCGATGGTGTGTCAGAAGATTCGACTTCTAAGGTAATG<br>GTTTTACCAGTCAAAGTTTTAACGAAAATTTGCATTGGGGAGGGTATTT<br>ACTTTTAAATA          | Amplification of <i>URA3-MET3-UBI4</i> cassette                                        |
| LAL-F    | CCTTACGTACAGCACACACATACCCTGTCGTGCACTGACCAACAACA<br>ATGCGGTGTTAATCGATAACCAAAAGATTATAAATAGGGGGTGAAGG<br>TCGCCCCAGGGTTTTCCAGTCACG   | Amplification of <i>UBI4::ARG4</i> cassette                                            |
| LAL-R    | GCAGCAATGATTATAAAAAATTAGAAACCCTCTCAATCTCAAGACCA<br>AGTGCAAGGTAGATTCTTTTTGGATGTTGTAGTCAGACAAGGTTCTGCC<br>ACTAAAGGGAACAAAAGC       | Amplification of <i>UBI4::ARG4</i> cassette                                            |
| LUL-F    | CATACATTGGGTAGGTCATTTCATAACAATTGATAGATGCAAGCTAATTG<br>GAATGAAAAATCCATCTTGTATCAAACCCTTTGTTCCTCATAGTTAATC<br>CGCCAGGGTTTTCCAGTCACG | Amplification of <i>UBI4::URA3</i> cassette                                            |
| LUL-R    | CTTTATAGAGTTTATAAATGTCAGTTTAAAGCTGAAAAAAATTATTATAG<br>TACAAATGTAAGATACTCTCATAATCAATGGGACCTGAATTGGACCCAC<br>TAAAGGGAACAAAAGC      | Amplification of <i>UBI4::URA3</i> cassette                                            |
| UBI4S-F  | CGTCAACTAACATATATATAC                                                                                                            | Amplification of <i>UBI4</i> probe for Southern analysis                               |
| UBI4S-R  | GCCTAGTCTATAAAAACAAAAC                                                                                                           | Amplification of <i>UBI4</i> probe for Southern analysis                               |
| LALS-F   | GGTAGATCAAGAAATGATC                                                                                                              | Amplification of <i>ARG4</i> probe for Southern analysis                               |
| LALS-R   | CAATCAGTAAAGTAGAAATC                                                                                                             | Amplification of <i>ARG4</i> probe for Southern analysis                               |
| LULS-F   | CCTATAGTGAGAGAGCAG                                                                                                               | Amplification of <i>URA3</i> probe for Southern analysis                               |
| LULS-R   | GGATCTCTTCCTTTACC                                                                                                                | Amplification of <i>URA3</i> probe for Southern analysis                               |
| ACT1-F   | ACCACCGGTATTGTTTTGGA                                                                                                             | Real time RT-PCR of <i>ACT1</i> transcript levels                                      |
| ACT1-R   | AGCGTAAATTGGAACAACGTG                                                                                                            | Real time RT-PCR of <i>ACT1</i> transcript levels                                      |
| ACT1-P   | ACCACCGGTATTGTTTTGGATTCTGGTGATGGTGTACTCACGTTGTTT<br>CAATTTACGCT                                                                  | Probe for real time RT-PCR of <i>ACT1</i> transcript levels                            |
| UBI4q-F  | CGTCAAATCCAAGATCCAAGA                                                                                                            | Real time RT-PCR of <i>UBI4</i> transcript levels                                      |
| UBI4q-R  | CGGCGAAAATCAATCTTTGT                                                                                                             | Real time RT-PCR of <i>UBI4</i> transcript levels                                      |
| UBI4q-P  | CCATCGATAACGTCAAATCCAAGATCCAAGACAAGAAGGTATTCCACC<br>AGACCAACAAGATTGATTTTCGCCGGTAAACAATT                                          | Probe for real time RT-PCR of <i>UBI4</i> transcript levels                            |
| UBI4-F   | GAACAGATATGTTGGTTCCAGGATTGAAAAG                                                                                                  | Amplification of <i>UBI4</i>                                                           |
| UBI4-R   | CCTATTTGTAGACTCGGGTAATAGC                                                                                                        | Amplification of <i>UBI4</i>                                                           |
| UBI4C-F  | TATCGAATTCACGCGTGACTCAGATCGATAAGCGAACATCACAGC                                                                                    | Amplification of <i>UBI4</i> for cloning                                               |
| UBI4C-R  | GGTACCTGGAGTCGACCAATGTGAGGACTGGCTAACTTAATAGG                                                                                     | Amplification of <i>UBI4</i> for cloning                                               |
